# Supplementary material for: Detection and quantification of dengue virus using a novel biosensor system based on dengue NS3 protease activity
Source: PubMed Central journal article supplement (PMC5697845; doi:10.1371/journal.pone.0188170), 2017-11-21

**S1 Fig. Localization of NS4B with or without present of NS2B3.** BHK-21 cells were transfected with pSen-Cre. 24 hours post-transfect, localization of NS4B (red) and ER membranes (calnexin, green) were detected by immunostaining and nuclei were counterstained by Hoechst (magnification, 100×). The fluorescence intensity was analyzed by LEICA Application Suite software.

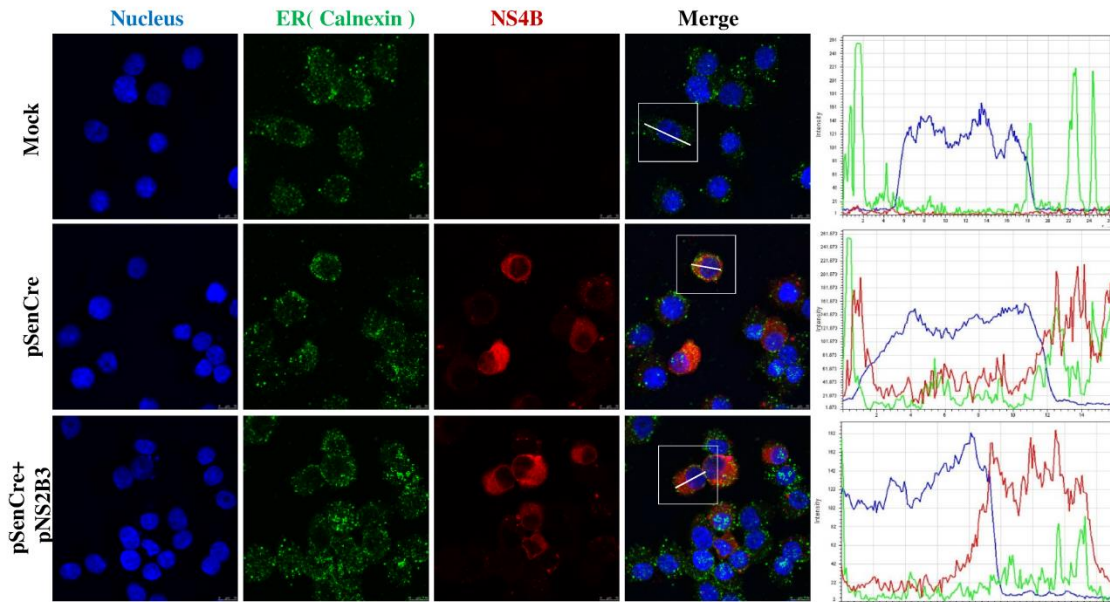

Supplement: pone.0188170.s001.pdf [file pone.0188170.s001.pdf]
