# Supplementary material for: Detection and quantification of dengue virus using a novel biosensor system based on dengue NS3 protease activity
Source: PubMed Central journal article supplement (PMC5697845; doi:10.1371/journal.pone.0188170), 2017-11-21
Supplement: pone.0188170.s004.pdf [file pone.0188170.s004.pdf]

**S4 Fig. The alignment of flavivirus amino acid sequences around the NS4B-NS5.** (A) The sequence of the natural cleavage sites of the NS3 protease in the NS4B and NS4B/NS5 boundary of the polyprotein precursor. Identical residues are shaded in black and conserved residues are shaded in light grey. (B) Percent identity for flavivirus NS3 protease domain. The amino acid sequences of NS3 protease domain for DENV-1/Hawaii, DENV-3/H-87, DENV-4/H241, Zika virus/PRVABC59, JEV/Beijing-1 are aligned with DENV-2/16681 using the Vector NTI–AlignX software.

A.

|                   | P2  | P1 | P1' | P2' | P3' |
|-------------------|-----|----|-----|-----|-----|
| DENV 1_ABG75766.1 | GGG | RR | GTG | AA  | QG  |
| DENV 2_AAB58782.1 | TNT | RR | GTG | NI  | IG  |
| DENV 3_M93130.1   | GTG | KR | GTG | SQ  | QG  |
| DENV 4_AAX48017.1 | QTP | RR | GTG | TT  | GTG |
| Zika_AMC13911.1   | LVK | RR | GGG | T   | G   |
| JEV_AOT86221.1    | PSL | KR | GR  | P   | GGR |
| HCV_AAK08509.1    | ITE | EC | PV  | P   | CSG |

▲  
Virus protease cleavage site

B.

|        | DENV 2 | DENV 1 | DENV 3 | DENV 4 | Zika | JEV | HCV |
|--------|--------|--------|--------|--------|------|-----|-----|
| DENV 2 | 100    | 74     | 72     | 70     | 58   | 54  | 15  |
| DENV 1 |        | 100    | 79     | 71     | 58   | 61  | 16  |
| DENV 3 |        |        | 100    | 73     | 59   | 56  | 16  |
| DENV 4 |        |        |        | 100    | 60   | 58  | 15  |
| Zika   |        |        |        |        | 100  | 62  | 16  |
| JEV    |        |        |        |        |      | 100 | 15  |
| HCV    |        |        |        |        |      |     | 100 |
