# Supplementary material for: Detection and quantification of dengue virus using a novel biosensor system based on dengue NS3 protease activity
Source: PubMed Central journal article supplement (PMC5697845; doi:10.1371/journal.pone.0188170), 2017-11-21
Supplement: pone.0188170.s005.pdf [file pone.0188170.s005.pdf]

**S1 Table Oligonucleotide primers used for PCR amplification.**

| Oligonucleotide                              | Sequence <sup>a</sup>                                                   |
|----------------------------------------------|-------------------------------------------------------------------------|
| <i>XhoI</i> -Kozak-NS4B-F                    | 5'-GGGCCCTCTAGACT <b>CGAGGCCACCAT</b> GGCAAACGAGATGGGTTTCCTAGAAAAACG-3' |
| <i>AflII</i> -EcoRI-(N <sub>10</sub> -NS5)-R | 5'-GTTTAAACTTAAGCGAATTCCTCTCCAAGCGTCTCTCCTATG-3'                        |
| <i>EcoRI</i> -nCre-F                         | 5'-ATCTGCAGAATT <u>CCCCAAGAAGAAGAGGAAGGTGTCCAATTTACTGACCGTACA</u> -3'   |
| <i>XhoI</i> -NotI-Cre-F                      | 5'- TCTAGACTCGAGCGGCCGCATGTCCAATTTACTGACCGTAC -3'                       |
| <i>AflII</i> -HindIII-Cre-R                  | 5'-GTTTAAACTTAAGCTTCTAATCGCCATCTTCCAGCAGGCGC-3'                         |
| <i>XhoI</i> -NotI-NS2B-F                     | 5'-TCTAGACTCGAGCGGCCGCATGAGCTGGCCATTAAATGAGGCTA-3'                      |
| <i>AflII</i> -HindIII-NS3-R                  | 5'-CGGCACTTAAGCTTCTACTTTCTCCGGCTGCAAATTC-3'                             |
| <i>BamHI</i> -EGFP-F                         | 5'-AATTAAGGATCCATGGTGAGCAAGGGCGAGGAG-3'                                 |
| <i>XbaI</i> -EGFP-R                          | 5'-CGTGCCCTAGATTACTTGTACAGCTCGTCCAT-3'                                  |

<sup>a</sup> italics, the restriction endonuclease; bold text, the Kozak sequence; underlined text, SV40 NLS.
