# Supplementary material for: Detection and quantification of dengue virus using a novel biosensor system based on dengue NS3 protease activity
Source: PubMed Central journal article supplement (PMC5697845; doi:10.1371/journal.pone.0188170), 2017-11-21

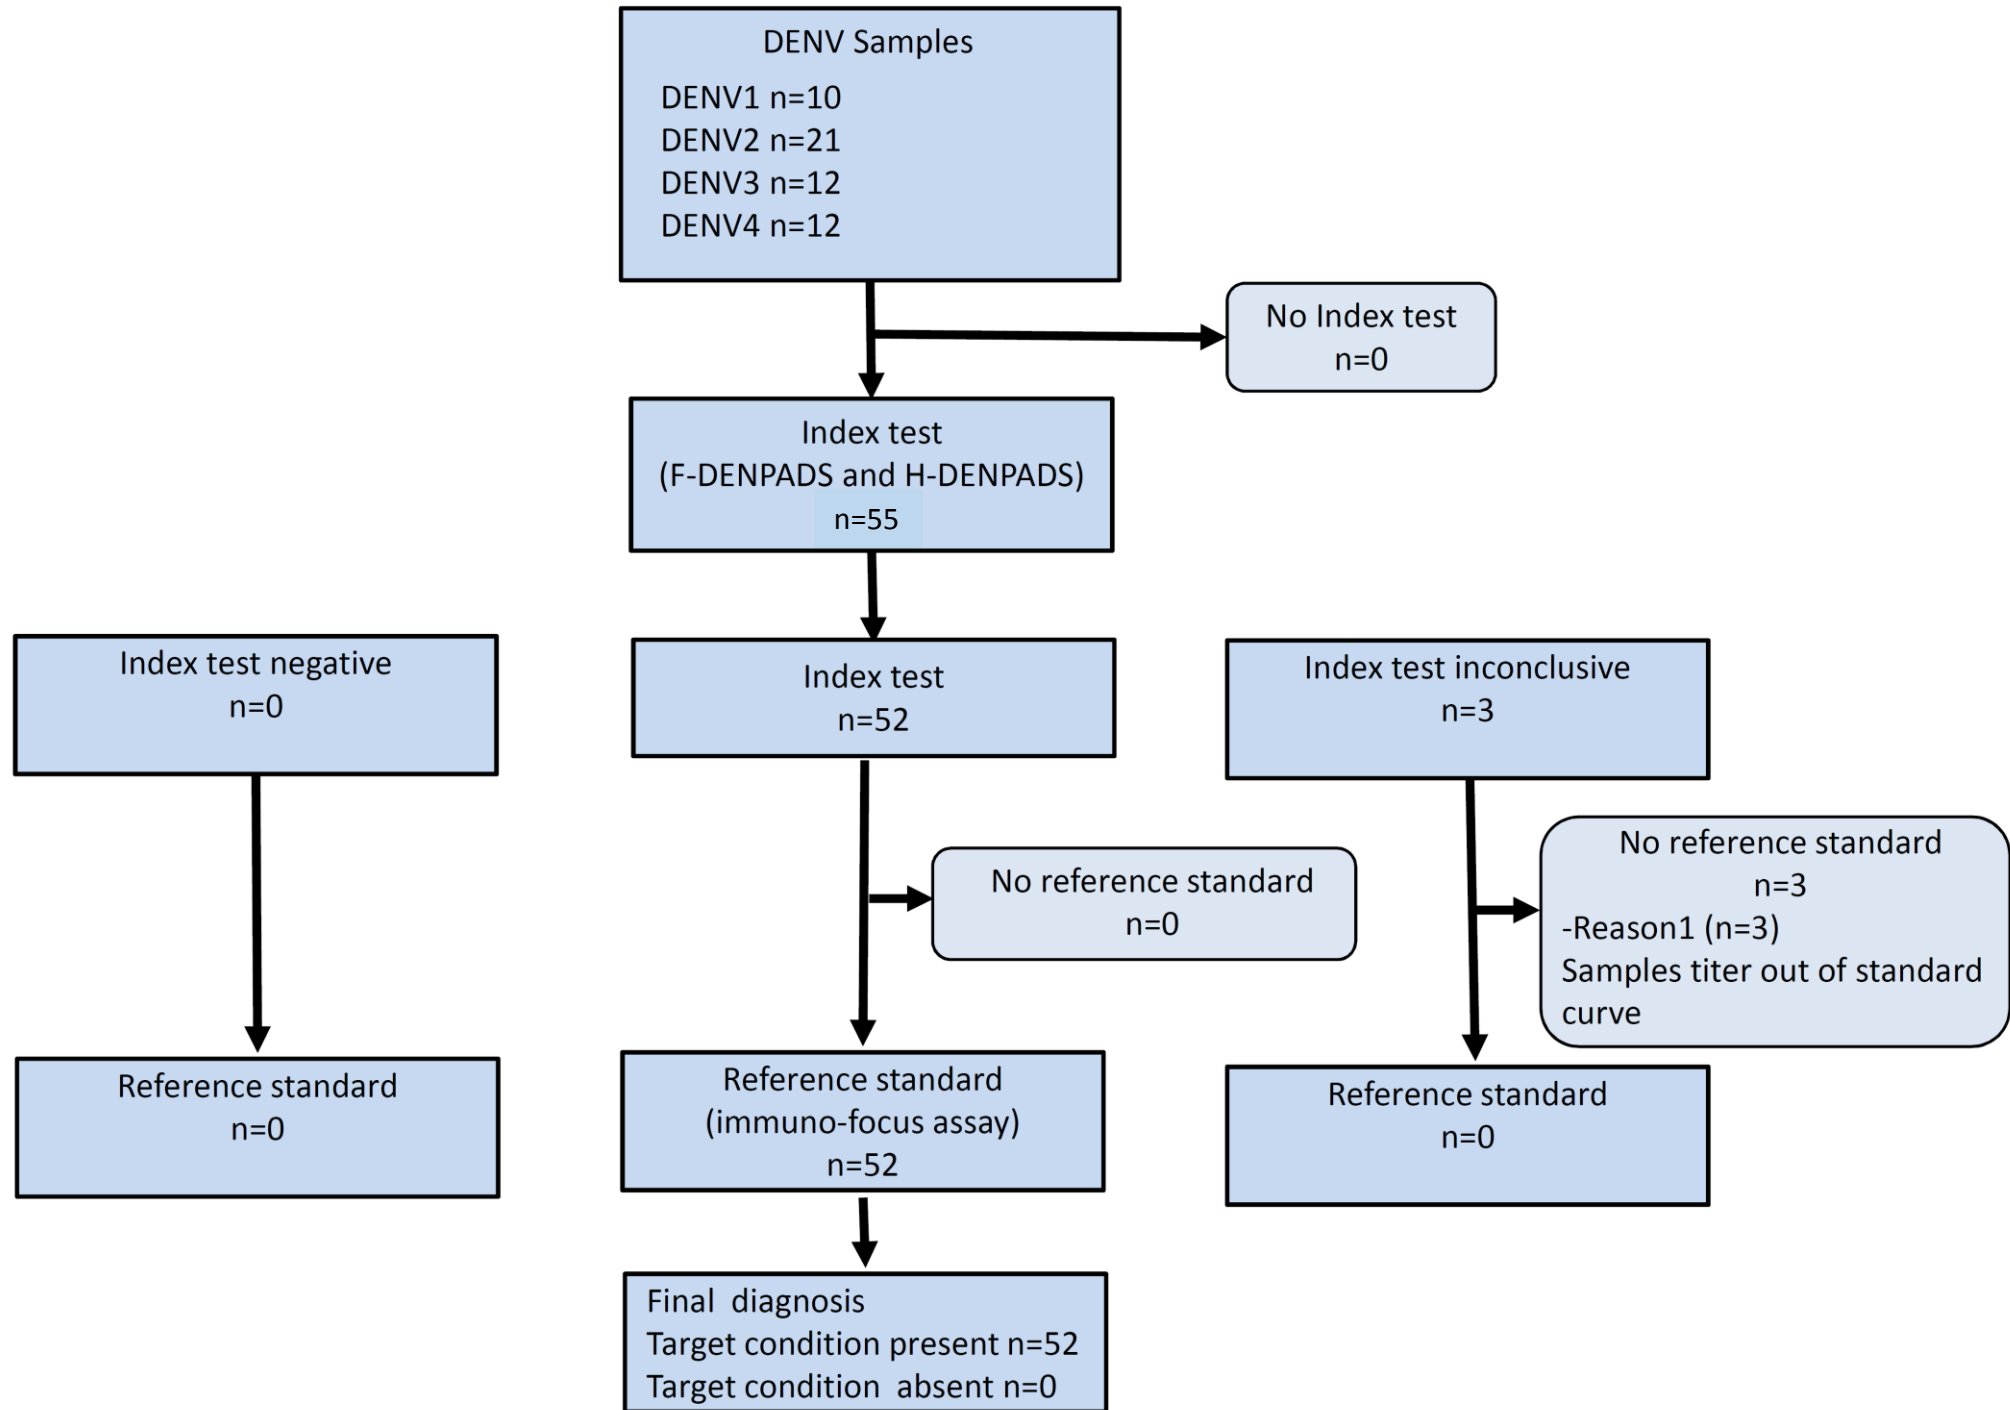

Supplement: pone.0188170.s007.pdf [file pone.0188170.s007.pdf]
